# Supplementary material for: Electrochemical and magnetic properties of nanostructured CoMn2O4and Co2MnO4
Source: Royal Society of Chemistry journal article supplement (doi:10.1039/c5ra16937b), 2015-01-01
Supplement: c5ra16937b1.pdf [file c5ra16937b1.pdf]

### Electronic Supplementary Information

## Electrochemical and magnetic properties of nanostructured $\text{CoMn}_2\text{O}_4$ and $\text{Co}_2\text{MnO}_4$

Neha Garg <sup>a</sup>, Monu Mishra <sup>b</sup>, Govind <sup>b</sup> and Ashok Kumar Ganguli <sup>a, c\*</sup>

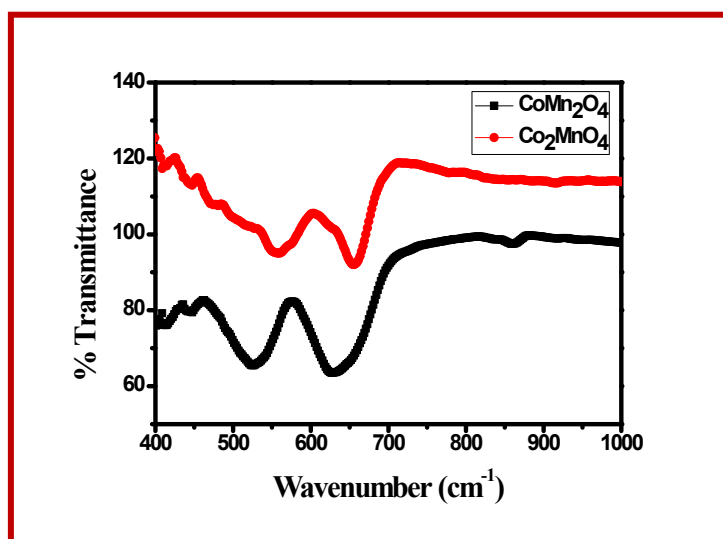

Figure S1. FTIR spectra of  $\text{CoMn}_2\text{O}_4$  and  $\text{Co}_2\text{MnO}_4$  nanostructures

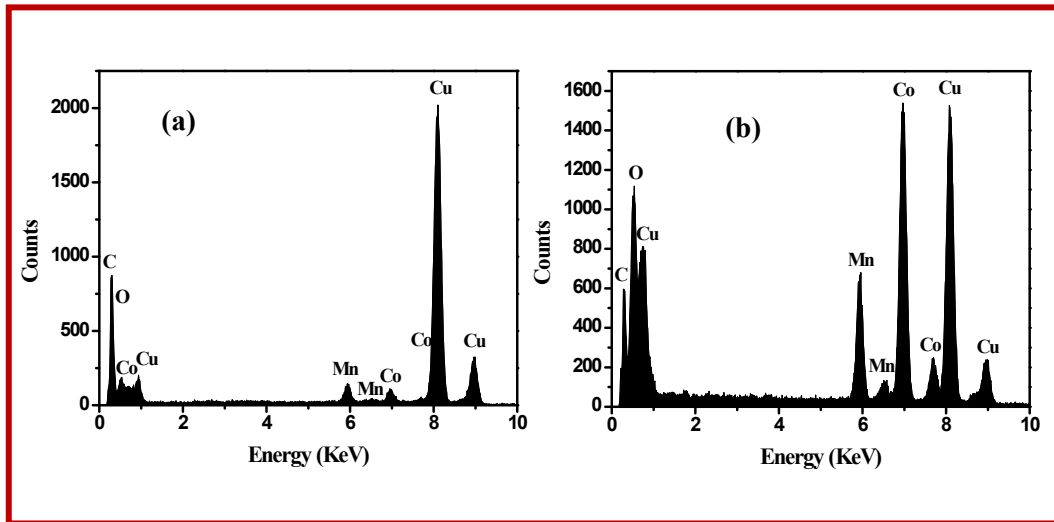

Figure S2. TEM-EDX of (a)  $\text{CoMn}_2\text{O}_4$  and (b)  $\text{Co}_2\text{MnO}_4$  nanostructures

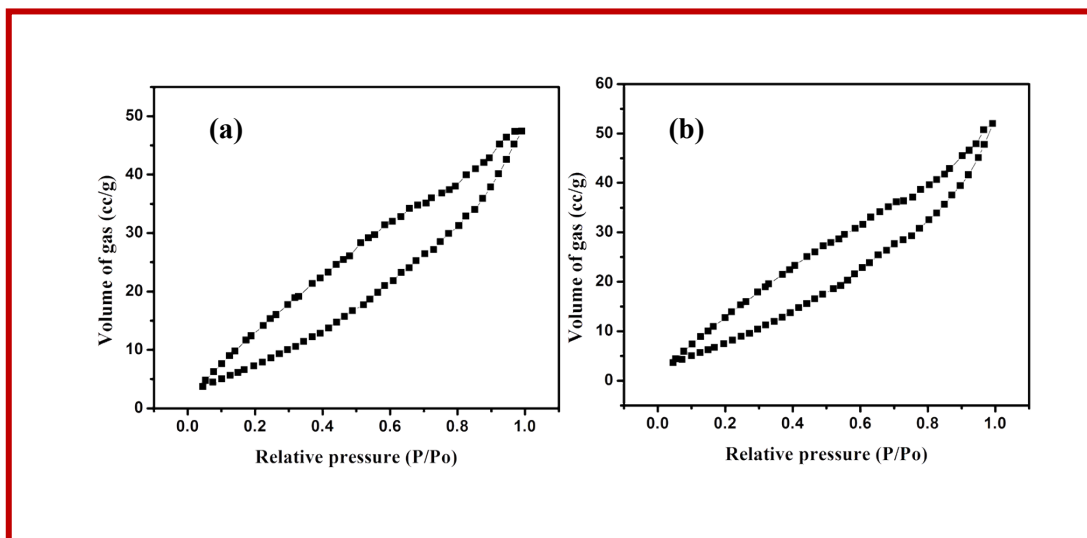

**Figure S3.** Nitrogen adsorption and desorption isotherms measured at 77 K for (a) CoMn<sub>2</sub>O<sub>4</sub> and (b) Co<sub>2</sub>MnO<sub>4</sub> nanocubes
